# Supplementary material
Source: PubMed Central journal article supplement (PMC4956600)
Supplement: NIHMS746453-supplement-Supplement.pdf [file NIHMS746453-supplement-Supplement.pdf]

**Web-based Supplementary Materials for "Spatial regression with  
covariate measurement error: A semi-parametric approach," by  
Md Hamidul Huque, Howard D. Bondell, Raymond J. Carroll,  
and Louise M. Ryan.**

**Web Appendix A**

*Estimation of  $\hat{\theta}_2$  and its asymptotic distribution*

We assume that the smoothing parameters are small relative to the sample size, i.e.,  $n^{1/2}\delta_j \rightarrow 0$  for  $j = 1, 2$ . From (4) we estimate  $\theta_2$  by minimizing the penalized sum of squares  $\mathbf{J}(\theta_2) = n^{-1}\sum_{i=1}^n \{W_i - B_2^T(S_i)\theta_2\}^2 + \delta_2\theta_2^T D_2\theta_2$ . We have

$$\begin{aligned} \frac{\partial \mathbf{J}(\theta_2)}{\partial \theta_2} &= 0 \\ \Rightarrow 2n^{-1}\sum_{i=1}^n \{W_i - B_2^T(S_i)\theta_2\}B_2(S_i) + 2\delta_2 D_2\theta_2 &= 0 \\ \Rightarrow n^{-1}\sum_{i=1}^n B_2(S_i)W_i - \{n^{-1}\sum_{i=1}^n B_2(S_i)B_2^T(S_i) - \delta_2 D_2\}\theta_2 &= 0 \\ \Rightarrow n^{-1}\sum_{i=1}^n B_2(S_i)W_i - \Lambda_{n2}^{-1}\theta_2 &= 0 \\ \Rightarrow \hat{\theta}_2 = \Lambda_{n2}n^{-1}\sum_{i=1}^n B_2(S_i)W_i. \end{aligned}$$

Now, the asymptotics of  $\hat{\theta}_2$  can be given by

$$\begin{aligned} n^{1/2}(\hat{\theta}_2 - \theta_2) &= n^{1/2}(\Lambda_{n2}n^{-1}\sum_{i=1}^n B_2(S_i)W_i - \theta_2) \\ &= n^{1/2}(\Lambda_{n2}n^{-1}\sum_{i=1}^n B_2(S_i)[B_2^T(S_i)\theta_2 + U_i] - \theta_2) \\ &= n^{1/2}\Lambda_{n2}(n^{-1}\sum_{i=1}^n B_2(S_i)B_2^T(S_i) - \Lambda_{n2}^{-1})\theta_2 + \Lambda_{n2}n^{-1/2}\sum_{i=1}^n B_2(S_i)U_i \\ &= \Lambda_{n2}n^{-1/2}\sum_{i=1}^n B_2(S_i)U_i + o_p(1). \end{aligned}$$

Thus,

$$(\hat{\theta}_2 - \theta_2) = n^{-1}\Lambda_{n2}\sum_{i=1}^n B_2(S_i)U_i + o_p(n^{-1/2}). \quad (15)$$

This is because as,  $n^{1/2}\delta_j \rightarrow 0$ , then

$$n^{-1}\sum_{i=1}^n B_2(S_i)B_2^T(S_i) - \Lambda_{n2}^{-1} = \delta_2 D_2 = o_p(n^{-1/2}). \quad (16)$$

*Estimation of  $\hat{\theta}_1$*

From (3), we estimate  $\beta_1$  and  $\theta_1$  by minimizing the penalized sum of squares  $\mathbf{J}(\beta, \theta_1) = n^{-1}\sum_{i=1}^n \{Y_i - B_2^T(S_i)\theta_2\beta_1 - B_1^T(S_i)\theta_1\}^2 + \delta_1\theta_1^T D_1\theta_1$ . That is,

$$\begin{aligned} \frac{\partial \mathbf{J}(\beta, \theta_1)}{\partial \beta_1} &= 0 \\ \Rightarrow 2n^{-1}\sum_{i=1}^n \{Y_i - B_2^T(S_i)\hat{\theta}_2\beta_1 - B_1^T(S_i)\theta_1\}B_2^T(S_i)\hat{\theta}_2 &= 0 \\ \Rightarrow n^{-1}\sum_{i=1}^n \{B_2^T(S_i)\hat{\theta}_2 Y_i - \hat{\theta}_2 B_2^T(S_i)B_2^T(S_i)\hat{\theta}_2\beta_1 - \hat{\theta}_2 B_2^T(S_i)B_1^T(S_i)\theta_1\} &= 0 \\ \Rightarrow n^{-1}\sum_{i=1}^n \{B_2^T(S_i)\hat{\theta}_2 Y_i - \hat{\theta}_2 B_2^T(S_i)B_2^T(S_i)\hat{\theta}_2\beta_1 - \hat{\theta}_2 B_2^T(S_i)B_1^T(S_i)\theta_1\} &= 0, \end{aligned}$$

and

$$\begin{aligned} \frac{\partial \mathbf{J}(\beta, \theta_1)}{\partial \theta_1} &= 0 \\ \Rightarrow 2n^{-1}\sum_{i=1}^n \{Y_i - B_2^T(S_i)\hat{\theta}_2\beta_1 - B_1^T(S_i)\theta_1\}B_1(S_i) + 2\delta_1 D_1\theta_1 &= 0 \\ \Rightarrow n^{-1}\sum_{i=1}^n \{B_1(S_i)Y_i - B_1(S_i)B_2^T(S_i)\hat{\theta}_2\beta_1 - B_1(S_i)B_1^T(S_i)\theta_1\} + \delta_1 D_1\theta_1 &= 0 \\ \Rightarrow n^{-1}\sum_{i=1}^n B_1(S_i)Y_i - n^{-1}\sum_{i=1}^n B_1(S_i)B_2^T(S_i)\hat{\theta}_2\beta_1 - (n^{-1}\sum_{i=1}^n B_1(S_i)B_1^T(S_i) - \delta_1 D_1)\theta_1 &= 0 \\ \Rightarrow n^{-1}\sum_{i=1}^n B_1(S_i)Y_i - n^{-1}\sum_{i=1}^n B_1(S_i)B_2^T(S_i)\hat{\theta}_2\beta_1 - \Lambda_{n1}^{-1}\theta_1 &= 0 \\ \Rightarrow n^{-1}\{\sum_{i=1}^n B_1(S_i)Y_i - n^{-1}\sum_{i=1}^n B_1(S_i)B_2^T(S_i)\hat{\theta}_2\beta_1 - \Lambda_{n1}^{-1}\theta_1\} &= 0. \end{aligned}$$

This leads to the estimating equations

$$0 = n^{-1}\sum_{i=1}^n \begin{Bmatrix} B_1(S_i)Y_i \\ B_2^T(S_i)\hat{\theta}_2 Y_i \end{Bmatrix} - n^{-1}\sum_{i=1}^n \begin{Bmatrix} \Lambda_{n1}^{-1} & B_1(S_i)B_2^T(S_i)\hat{\theta}_2 \\ B_1^T(S_i)B_2^T(S_i)\hat{\theta}_2 & \hat{\theta}_2^T B_2^T(S_i)B_2^T(S_i)\hat{\theta}_2 \end{Bmatrix} \begin{pmatrix} \theta_1 \\ \beta_1 \end{pmatrix}.$$

Writing  $\widehat{G}_2(S_i) = B_2^T(S_i)\widehat{\theta}_2$ , we see that the estimating equations are

$$0 = \sum_{i=1}^n \{B_1(S_i)Y_i - \Lambda_{n1}^{-1}\widehat{\theta}_1 - B_1(S_i)\widehat{G}_2(S_i)\widehat{\beta}_1\}; \quad (17)$$

$$0 = \sum_{i=1}^n \widehat{G}_2(S_i)\{Y_i - B_1^T(S_i)\widehat{\theta}_1 - \widehat{G}_2(S_i)\widehat{\beta}_1\}. \quad (18)$$

Now from (17) we see that

$$\widehat{\theta}_1 = V_n - R_n\widehat{\theta}_2\widehat{\beta}_1,$$

where,

$$V_n = \Lambda_{n1}n^{-1}\sum_{i=1}^n B_1(S_i)Y_i,$$

$$R_n = \Lambda_{n1}n^{-1}\sum_{i=1}^n B_1(S_i)B_2^T(S_i).$$

*Estimation of  $\widehat{\beta}_1$*

Substituting the value of  $\widehat{\theta}_1$  in (18) we have

$$0 = \sum_{i=1}^n \widehat{G}_2(S_i)\{Y_i - B_1^T(S_i)V_n + B_1^T(S_i)R_n\widehat{\theta}_2\widehat{\beta}_1 - \widehat{G}_2(S_i)\widehat{\beta}_1\}.$$

From this,

$$\widehat{\beta}_1 = \frac{n^{-1}\sum_{i=1}^n \widehat{G}_2(S_i)\{Y_i - B_1^T(S_i)V_n\}}{n^{-1}\sum_{i=1}^n \widehat{G}_2(S_i)\{\widehat{G}_2(S_i) - B_1^T(S_i)R_n\widehat{\theta}_2\}}. \quad (19)$$

The numerator of (19) is

$$\begin{aligned} & n^{-1}\sum_{i=1}^n \widehat{G}_2(S_i)\{Y_i - B_1^T(S_i)V_n\} \\ &= n^{-1}\sum_{i=1}^n Y_i B_2^T(S_i)\widehat{\theta}_2 - n^{-1}\sum_{i=1}^n \widehat{\theta}_2^T B_2(S_i)B_1^T(S_i)V_n \\ &= n^{-1}\sum_{i=1}^n Y_i B_2^T(S_i)\widehat{\theta}_2 - n^{-1}\sum_{i=1}^n \widehat{\theta}_2^T \{B_1(S_i)B_2^T(S_i)\}^T V_n \\ &= n^{-1}\sum_{i=1}^n Y_i B_2^T(S_i)\widehat{\theta}_2 - \widehat{\theta}_2^T R_n^T \Lambda_{n1}^{-1} V_n \\ &= n^{-1}\sum_{i=1}^n Y_i B_2^T(S_i)\widehat{\theta}_2 - V_n^T \Lambda_{n1}^{-1} R_n \widehat{\theta}_2 \\ &= n^{-1}\sum_{i=1}^n \{Y_i B_2^T(S_i) - V_n^T \Lambda_{n1}^{-1} R_n\} \widehat{\theta}_2 \\ &= n^{-1}\sum_{i=1}^n Y_i \{B_2^T(S_i) - B_1^T(S_i)R_n\} \widehat{\theta}_2. \end{aligned}$$

The denominator of (19) is

$$\begin{aligned}
& n^{-1} \sum_{i=1}^n \widehat{G}_2(S_i) \{ \widehat{G}_2(S_i) - B_1^T(S_i) R_n \widehat{\theta}_2 \\
&= \widehat{\theta}_2^T n^{-1} \sum_{i=1}^n B_2(S_i) \{ B_2^T(S_i) - B_1^T(S_i) R_n \} \widehat{\theta}_2 \\
&= \widehat{\theta}_2^T \{ n^{-1} \sum_{i=1}^n B_2(S_i) B_2^T(S_i) - n^{-1} \sum_{i=1}^n B_2(S_i) B_1^T(S_i) R_n \} \widehat{\theta}_2 \\
&= \widehat{\theta}_2^T (\mathcal{T}_n - R_n^T \Lambda_{n1}^{-1} R_n) \widehat{\theta}_2.
\end{aligned}$$

where,  $\mathcal{T}_n = n^{-1} \sum_{i=1}^n B_2(S_i) B_2^T(S_i)$  (say).

Hence,

$$\widehat{\beta}_1 = \frac{n^{-1} \sum_{i=1}^n Y_i \{ B_2^T(S_i) - B_1^T(S_i) R_n \} \widehat{\theta}_2}{\widehat{\theta}_2^T (\mathcal{T}_n - R_n^T \Lambda_{n1}^{-1} R_n) \widehat{\theta}_2}.$$

### *Proof of Theorem 1*

To ease exposition, let us define the following expressions:

$$\begin{aligned}
\mathcal{A}_n &= n^{-1} \sum_{i=1}^n \{ G_2(S_i) \beta_1 + G_1(S_i) \} \{ B_2(S_i) - R_n^T B_1(S_i) \}^T; \\
\mathcal{C}_n &= \mathcal{T}_n - R_n^T \Lambda_{n1}^{-1} R_n; \\
\mathcal{D}_{ni} &= \{ B_2(S_i) - R_n^T B_1(S_i) \}^T \theta_2; \\
\mathcal{F}_{ni} &= \theta_2^T \mathcal{C}_n \Lambda_{n2} B_2(S_i) + B_2^T(S_i) \Lambda_{n2} \mathcal{C}_n \theta_2; \\
\mathcal{G}_{ni} &= \mathcal{D}_{ni} / \theta_2^T \mathcal{C}_n \theta_2; \\
\mathcal{H}_{ni} &= \mathcal{A}_n \Lambda_{n2} B_2(S_i) / \theta_2^T \mathcal{C}_n \theta_2 - \mathcal{A}_n \theta_2 \mathcal{F}_{ni} / (\theta_2^T \mathcal{C}_n \theta_2)^2.
\end{aligned} \tag{20}$$

Consider that the  $S_i$ 's are fixed and known and recall that,  $Y_i = G_2(S_i) \beta_1 + G_1(S_i) + \epsilon_i$ . Substituting the expression for  $Y_i$  into the numerator of (19) and simplifying using the

expression from (20), we have

$$\begin{aligned}
& n^{-1} \sum_{i=1}^n Y_i \{B_2^T(S_i) - B_1^T(S_i)R_n\} \widehat{\theta}_2 \\
&= n^{-1} \sum_{i=1}^n (B_2^T(S_i)\theta_2\beta_1 + B_1^T(S_i)\theta_1 + \epsilon_i) \{B_2^T(S_i) - B_1^T(S_i)R_n\} \widehat{\theta}_2 \\
&= n^{-1} \sum_{i=1}^n (B_2^T(S_i)\theta_2\beta_1 + B_1^T(S_i)\theta_1) \{B_2^T(S_i) - B_1^T(S_i)R_n\} \widehat{\theta}_2 + \\
& n^{-1} \sum_{i=1}^n \epsilon_i \{B_2^T(S_i) - B_1^T(S_i)R_n\} \widehat{\theta}_2 \\
&= \mathcal{A}_n \widehat{\theta}_2 + n^{-1} \sum_{i=1}^n \mathcal{D}_{ni} \epsilon_i \\
&= \mathcal{A}_n \theta_2 + \mathcal{A}_n (\widehat{\theta}_2 - \theta_2) + n^{-1} \sum_{i=1}^n \mathcal{D}_{ni} \epsilon_i.
\end{aligned}$$

Applying (15) to the above equation, we have

$$\mathcal{A}_n \theta_2 + n^{-1} \sum_{i=1}^n \{\mathcal{A}_n \Lambda_{n2} B_2(S_i) U_i + \mathcal{D}_{ni} \epsilon_i\} + o_p(n^{-1/2}).$$

Again, the denominator of (19) is

$$\widehat{\theta}_2^T (\mathcal{T}_n - R_n^T \Lambda_{n1}^{-1} R_n) \widehat{\theta}_2 = \widehat{\theta}_2^T \mathcal{C}_n \widehat{\theta}_2.$$

Now applying (15), the denominator becomes,

$$\begin{aligned}
& (\theta_2 + n^{-1} \sum_{i=1}^n \Lambda_{n2} B_2(S_i) U_i) + o_p(n^{-1/2})^T \mathcal{C}_n (\theta_2 + n^{-1} \sum_{i=1}^n \Lambda_{n2} B_2(S_i) U_i) + o_p(n^{-1/2}) \\
&= \theta_2^T \mathcal{C}_n \theta_2 + n^{-1} \sum_{i=1}^n \theta_2^T \mathcal{C}_n \Lambda_{n2} B_2(S_i) U_i + n^{-1} \sum_{i=1}^n U_i^T B_2(S_i)^T \Lambda_{n2} \mathcal{C}_n \theta_2 \\
&+ (n^{-1} \sum_{i=1}^n \Lambda_{n2} B_2(S_i) U_i)^T (n^{-1} \sum_{i=1}^n \Lambda_{n2} B_2(S_i) U_i) + o_p(n^{-1/2}) \\
&= \theta_2^T \mathcal{C}_n \theta_2 + n^{-1} \sum_{i=1}^n \mathcal{F}_{ni} U_i + o_p(n^{-1/2}).
\end{aligned}$$

Then, by a Taylor series expansion,

$$\begin{aligned}
\widehat{\beta}_1 &= \frac{\mathcal{A}_n \theta_2 + n^{-1} \sum_{i=1}^n \{\mathcal{A}_n \Lambda_{n2} B_2(S_i) U_i + \mathcal{D}_{ni} \epsilon_i\}}{\theta_2^T \mathcal{C}_n \theta_2 + n^{-1} \sum_{i=1}^n \mathcal{F}_{ni} U_i} + o_p(n^{-1/2}) \\
&= \left\{ \frac{\mathcal{A}_n \theta_2}{\theta_2^T \mathcal{C}_n \theta_2} + \frac{n^{-1} \sum_{i=1}^n \{\mathcal{A}_n \Lambda_{n2} B_2(S_i) U_i + \mathcal{D}_{ni} \epsilon_i\}}{\theta_2^T \mathcal{C}_n \theta_2} \right\} \left\{ 1 + \frac{\sum_{i=1}^n \mathcal{F}_{ni} U_i}{\theta_2^T \mathcal{C}_n \theta_2} \right\}^{-1} + o_p(n^{-1/2}) \\
&= \frac{\mathcal{A}_n \theta_2}{\theta_2^T \mathcal{C}_n \theta_2} + \frac{n^{-1} \sum_{i=1}^n \{\mathcal{A}_n \Lambda_{n2} B_2(S_i) U_i + \mathcal{D}_{ni} \epsilon_i\}}{\theta_2^T \mathcal{C}_n \theta_2} \\
&\quad - \frac{\mathcal{A}_n \theta_2}{(\theta_2^T \mathcal{C}_n \theta_2)^2} n^{-1} \sum_{i=1}^n \mathcal{F}_{ni} U_i + o_p(n^{-1/2}).
\end{aligned}$$

Thus

$$\widehat{\beta}_1 - \frac{\mathcal{A}_n \theta_2}{\theta_2^T \mathcal{C}_n \theta_2} = n^{-1} \sum_{i=1}^n (\mathcal{G}_{ni} \epsilon_i + \mathcal{H}_{ni} U_i) + o_p(n^{-1/2}).$$

Now considering the fact from equation (16) that  $n^{-1} \sum_{i=1}^n B_2(S_i) B_2^T(S_i) = \Lambda_{n2}^{-1} + o(n^{-1/2})$  and using this in the expression for  $\mathcal{A}_n \theta_2$ , we have

$$\begin{aligned} \mathcal{A}_n \theta_2 &= n^{-1} \sum_{i=1}^n \beta_1 \theta_2^T B_2(S_i) \{B_2^T(S_i) - B_1^T(S_i) R_n\} \theta_2 \\ &\quad + \theta_1^T n^{-1} \sum_{i=1}^n B_1(S_i) \{B_2^T(S_i) - B_1^T(S_i) R_n\} \theta_2 \\ &= \beta_1 \theta_2^T \mathcal{C}_n \theta_2 + \theta_1^T \{\Lambda_{n1}^{-1} - n^{-1} \sum_{i=1}^n B_1(S_i) B_1^T(S_i)\} R_n \theta_2 \\ &= \beta_1 \theta_2^T \mathcal{C}_n \theta_2 + o_p(n^{-1/2}). \end{aligned}$$

Therefore,

$$\frac{\mathcal{A}_n \theta_2}{\theta_2^T \mathcal{C}_n \theta_2} = \beta_1 + o_p(n^{-1/2}).$$

Hence,

$$n^{1/2}(\widehat{\beta}_1 - \beta_1) \sim \text{Normal}(0, \sigma^2),$$

where

$$\sigma^2 = \lim_{n \rightarrow \infty} n^{-1} \sum_{i=1}^n (\sigma_\epsilon^2 \mathcal{G}_{ni}^2 + \sigma_u^2 \mathcal{H}_{ni}^2). \quad (21)$$

Thus,  $\widehat{\beta}_1$  is a consistent estimate for  $\beta_1$ .

*Derivation of smoothing matrix*

From (3), we have

$$\begin{aligned}
\widehat{Y}_i &= B_2^T(S_i)\widehat{\theta}_2\widehat{\beta}_1 + B_1^T(S_i)\widehat{\theta}_1 \\
&= B_2^T(S_i)\widehat{\theta}_2\widehat{\beta}_1 + B_1^T(S_i)[V_n - R_n\widehat{\theta}_2\widehat{\beta}_1] \\
&= [B_2(S_i) - B_1^T(S_i)R_n]^T\widehat{\theta}_2\widehat{\beta}_2 + B_1^T(S_i)V_n \\
&= [B_2(S_i) - B_1^T(S_i)R_n]^T\widehat{\theta}_2 \left( \frac{n^{-1}\sum_{i=1}^n Y_i \{B_2^T(S_i) - B_1^T(S_i)R_n\}\widehat{\theta}_2}{\widehat{\theta}_2^T \mathcal{C}_n \widehat{\theta}_2} \right) \\
&\quad + B_1^T(S_i)\Lambda_{n1}n^{-1}\sum_{i=1}^n B_1(S_i)Y_i \\
&= \frac{D_{ni}n^{-1}\sum_{i=1}^n D_{ni}Y_i}{\widehat{\theta}_2^T \mathcal{C}_n \widehat{\theta}_2} + B_1^T(S_i)\Lambda_{n1}n^{-1}\sum_{i=1}^n B_1(S_i)Y_i.
\end{aligned}$$

Similarly from (4), we have

$$\begin{aligned}
\widehat{W}_i &= B_2^T(S_i)\widehat{\theta}_2 \\
&= B_2^T(S_i)\Lambda_{n2}n^{-1}\sum_{i=1}^n B_2(S_i)W_i.
\end{aligned}$$

**Web Table 1**

[Table 1 about here.]

## R Code

*Function for data generation*

```

dataSimulation<-function(nsamp=500,b0=1,b1=2, sigma.Delta=0.25,
  sigma.G=0.2,sigma.Y=0.5,range.par.Y=0.1)
{
# nsamp= Sample size for data generation.
# range.par.Y= Value of the range parameter for outcome variable.
# sigma.Delta= Measurement error variance.
# sigma.G=Variance for smooth spatial surface.
# sigma.Y=Residual error variance.
# b0=Intercept of the regression model.
# b1= Slope parameter for regression model.
# Load necessary R library
  require(nlme)
# generate grid of nsamp points uniformly on square
  s1 <- runif(nsamp)
  s2 <- runif(nsamp)
  spatDat <- data.frame(cbind(s1,s2))
#Covariance structure for Y following exponential correlation
  cs1Exp.Y <- corExp(range.par.Y, form = ~ s1 + s2)
  cs1Exp.Y <- Initialize(cs1Exp.Y, spatDat)
  R.Y.matrix <- corMatrix(cs1Exp.Y)
# Get true inverse covariance matrices, square roots, eigenvalues,
# used to generate data and also to compute bias correction factors
  eigen.decomp.corr.Y <- eigen(R.Y.matrix)
  gamma.Y.mat <- cbind(eigen.decomp.corr.Y$vectors)
  lambda.Y.vec <- eigen.decomp.corr.Y$val
  decomp.Y <- gamma.Y.mat%%diag(sqrt(lambda.Y.vec))%%
    t(gamma.Y.mat)
# generate true covariate X is is generated using a bivariate bump function
  X1 <- 1/(1+s1) + 3*exp(-50*(s1-.3)^2) + 2*exp(-25*(s1-.7)^2)
  X2 <- 1/(1+s2) + 3*exp(-50*(s2-.3)^2) + 2*exp(-25*(s2-.7)^2)
  X <-X1*X2
# generate observed covariate measured with error
# Z ~ N (X, variance = sigma.Delta)
  Z <- X + sqrt(sigma.Delta)*rnorm(nsamp)
# Generate smooth spatial surface
  G1<-sqrt(sigma.G)*decomp.Y%%rnorm(nsamp)
# generate outcome Y | X ~ N (b0 + b1 X+G1(si)+variance)
  Y <- b0 + b1*X+G1+sqrt(sigma.Y)*rnorm(nsamp)
  data<-as.data.frame(cbind(s1=s1,s2=s2,X=X,Z=Z,Y=as.vector(Y)))
  data
}

```

*Necessary functions for implementing the proposed method*

```

#### Function for selecting knots in two dimensional space
defaultKnots2D <- function(x1,x2,num.knots)
{
  require("cluster")
  # Set default value for num.knots
  if (missing(num.knots))
    num.knots <- max(10,min(50,round(length(x1)/4)))
  # Delete repeated values from x
  X <- cbind(x1,x2)
  dup.inds <- (1:nrow(X))[dup.matrix(X)==T]
  if (length(dup.inds) > 0)
    X <- X[-dup.inds,]
  # Obtain and output knots chosen using
  # coverage design principles
  knots <- clara(X,num.knots)$medoids
  return(knots)
}

#### Function for penalty matrices using thin plate basis
# Set up thin plate spline generalised covariance function:
tps.cov <- function(r,m=2,d=1)
{
  r <- as.matrix(r)
  num.row <- nrow(r)
  num.col <- ncol(r)
  r <- as.vector(r)
  nzi <- (1:length(r))[r!=0]
  ans <- rep(0,length(r))
  if ((d+1)%2!=0)
    ans[nzi] <- (abs(r[nzi]))^(2*m-d)*log(abs(r[nzi])) # d is even
  else
    ans[nzi] <- (abs(r[nzi]))^(2*m-d)
  if (num.col>1) ans <- matrix(ans,num.row,num.col) # d is odd
  return(ans)
}

# Set up function for matrix square-roots:
matrix.sqrt <- function(A)
{
  sva <- svd(A)
  if (min(sva$d)>=0)
    Asqrt <- t(sva$v %*% (t(sva$u) * sqrt(sva$d)))
  else
    stop("Matrix square root is not defined")
  return(Asqrt)
}

Ztps <- function(x,knots)
{
  # Obtain matrix of inter-knot distances:
  numKnots <- nrow(knots)
  dist.mat <- matrix(0,numKnots,numKnots)
  dist.mat[lower.tri(dist.mat)] <- dist(as.matrix(knots))
  dist.mat <- dist.mat + t(dist.mat)
  Omega <- tps.cov(dist.mat,d=2)
  # Obtain preliminary Z matrix of knot to data covariances:
  x.knot.diffs.1 <- outer(x[,1],knots[,1],"-")
  x.knot.diffs.2 <- outer(x[,2],knots[,2],"-")
  x.knot.dists <- sqrt(x.knot.diffs.1^2+x.knot.diffs.2^2)
  prelim.Z <- tps.cov(x.knot.dists,m=2,d=2)
  # Transform to canonical form:
  sqrt.Omega <- matrix.sqrt(Omega)
  Z <- t(solve(sqrt.Omega,t(prelim.Z)))
  output<-list(basis=prelim.Z, penalty=Omega ,Z=Z)
}

```

```

    return(output)
}
#Function for generalized cross validation for delta2
gcv.delta2<-function(nsamp,Z,B2,BTB.2, D2, delta.2)
{
  Lambda.2.inv<-1/nsamp*BTB.2+delta.2*D2
  eigen.decomp.Lambda.2 <- eigen(Lambda.2.inv)
  eigen.Lambda.2.mat <- cbind(eigen.decomp.Lambda.2$vectors)
  eigen.Lambda.2.vec <- eigen.decomp.Lambda.2$val
  Lambda.2<-eigen.Lambda.2.mat%%diag(1/eigen.Lambda.2.vec)%%
    t(eigen.Lambda.2.mat)
  theta.2.Hat<-1/nsamp*Lambda.2%%(t(B2)%%Z)
  RSS.delta2<-t(Z-B2%%theta.2.Hat)%%(Z-B2%%theta.2.Hat)
  smooth.delta2<-1/nsamp*B2%%Lambda.2%%t(B2)
  gcv.delta2<-1/nsamp*
    as.vector(RSS.delta2)/(1-1/nsamp*sum(diag(smooth.delta2)))^2
  gcv.delta2
}
#Function for generalized cross validation for delta1
gcv.delta1<-function(nsamp,Y,Z,B1,B2,BTB.1,BTB.2,D1, D2, delta.2,delta.1)
{
  Lambda.2.inv<-1/nsamp*BTB.2+delta.2*D2
  eigen.decomp.Lambda.2 <- eigen(Lambda.2.inv)
  eigen.Lambda.2.mat <- cbind(eigen.decomp.Lambda.2$vectors)
  eigen.Lambda.2.vec <- eigen.decomp.Lambda.2$val
  Lambda.2<-eigen.Lambda.2.mat%%diag(1/eigen.Lambda.2.vec)%%
    t(eigen.Lambda.2.mat)
  theta.2.Hat<-1/nsamp*Lambda.2%%(t(B2)%%Z)
  RSS.delta2<-t(Z-B2%%theta.2.Hat)%%(Z-B2%%theta.2.Hat)
  smooth.delta2<-1/nsamp*B2%%Lambda.2%%t(B2)
  gcv.delta2<-1/nsamp*
    as.vector(RSS.delta2)/(1-1/nsamp*sum(diag(smooth.delta2)))^2
  Lambda.1.inv<-1/nsamp*BTB.1+delta.1*D1
  eigen.decomp.Lambda.1 <- eigen(Lambda.1.inv)
  eigen.Lambda.1.mat <- cbind(eigen.decomp.Lambda.1$vectors)
  eigen.Lambda.1.vec <- eigen.decomp.Lambda.1$val
  Lambda.1<-eigen.Lambda.1.mat%%diag(1/eigen.Lambda.1.vec)%%
    t(eigen.Lambda.1.mat)
  ### Generating the required components for equation (13)
  Vn<-1/nsamp*Lambda.1%%(t(B1)%%Y)
  Rn<-1/nsamp*Lambda.1%%crossprod(B1,B2)
  Tn<-1/nsamp*BTB.2
  Cn<-(Tn-t(Rn)%%Lambda.1.inv%%Rn)
  Dn<-(B2-B1%%Rn)%%theta.2.Hat
  numerator<-1/nsamp*t(Y)%%Dn
  denominator<-t(theta.2.Hat)%%Cn%%theta.2.Hat
  # Estimates of the regression parameter
  b1.hat.basis<-numerator/denominator
  theta.1.Hat<-Vn-Rn%%theta.2.Hat*as.vector(b1.hat.basis)
  RSS.Y<-
    t(Y-B2%%theta.2.Hat*as.vector(b1.hat.basis)-B1%%theta.1.Hat)%%
    (Y-B2%%theta.2.Hat*as.vector(b1.hat.basis)-B1%%theta.1.Hat)
  smooth.mat<-1/(nsamp*as.vector(denominator))*Dn%%t(Dn)+
    1/nsamp*(B1%%Lambda.1%%t(B1))
  gcv.delta1<-as.vector(RSS.Y)/(1-1/nsamp*sum(diag(smooth.mat)))^2
  gcv<-gcv.delta1
  return(gcv)
}

```

*Codes for Data analysis*

```

# Set the number of knots
q1=125
q2=150
# Get the data
set.seed(123456)
data<-dataSimulation()
# Extract the coordinates (s1,s2), covariate Z and outcome Y
s1<-data$s1
s2<-data$s2
Z<-data$Z
Y<-data$Y
nsamp<-nrow(data)
# Load relevant R library
require(cluster)
require(SemiPar)
# Section of knot locations
Knots1<-defaultKnots2D(s1,s2,q1)
Knots2<-defaultKnots2D(s1,s2,q2)
# Generating thin plate spline basis B1(.) & B2(.) with q1 and q2 knots
# respectively
B1<-cbind(rep(1,nsamp),s1,s2,Ztps(cbind(s1,s2),Knots1)$basis)
B2<-cbind(rep(1,nsamp),s1,s2,Ztps(cbind(s1,s2),Knots2)$basis)
### Generating penulty matrices
k1<-nrow(Knots1)+3
k2<-nrow(Knots2)+3
D1<-matrix(0,k1,k1)
D2<-matrix(0,k2,k2)
D1[4:k1,4:k1]<-Ztps(cbind(s1,s2),Knots1)$penalty
D2[4:k2,4:k2]<-Ztps(cbind(s1,s2),Knots2)$penalty
### Generating Lambda1 and Lambda2
BTB.1 <- crossprod(B1,B1)
BTB.2 <- crossprod(B2,B2)
# Estimating delta.2
delta.range<-seq(-11, 11, length.out =60)
V<-rep(0,60)
for (i in 1:60){
V[i]<-gcv.delta2(nsamp,Z,B2,BTB.2, D2,exp(delta.range[i]))}
index.delta2<-(1:60)[V==min(V)]
delta.2<-10^delta.range[index.delta2]
# Estimating delta.1
U<-rep(0,60)
for (i in 1:60){
U[i]<-gcv.delta1(nsamp,Y,Z,B1,B2,BTB.1,BTB.2,D1,D2,delta.2,
exp(delta.range[i]))}
index.delta1<-(1:60)[U==min(U)]
delta.1<-10^delta.range[index.delta1]
#Get lambda.1 using eigen value decomposition
Lambda.1.inv<-1/nsamp*BTB.1+delta.1*D1
eigen.decomp.Lambda.1 <- eigen(Lambda.1.inv)
eigen.Lambda.1.mat <- cbind(eigen.decomp.Lambda.1$vectors)
eigen.Lambda.1.vec <- eigen.decomp.Lambda.1$val
Lambda.1<-eigen.Lambda.1.mat%*%diag(1/eigen.Lambda.1.vec)%*%
t(eigen.Lambda.1.mat)
#Get lambda.2 using eigen value decomposition
Lambda.2.inv<-1/nsamp*BTB.2+delta.2*D2
eigen.decomp.Lambda.2 <- eigen(Lambda.2.inv)
eigen.Lambda.2.mat <- cbind(eigen.decomp.Lambda.2$vectors)
eigen.Lambda.2.vec <- eigen.decomp.Lambda.2$val
Lambda.2<-eigen.Lambda.2.mat%*%diag(1/eigen.Lambda.2.vec)%*%

```

```

      t(eigen.Lambda.2.mat)
### Generating the required components for equation (13)
theta.2.Hat<-1/nsamp*Lambda.2%*(t(B2)%*Z)
Vn<-1/nsamp*Lambda.1%*(t(B1)%*Y)
Rn<-1/nsamp*Lambda.1%*crossprod(B1,B2)
Tn<-1/nsamp*BTB.2
Cn<-(Tn-t(Rn)%*Lambda.1.inv%*Rn)
Dn<-(B2-B1%*Rn)%*theta.2.Hat
numerator<-1/nsamp*t(Y)%*Dn
denominator<-t(theta.2.Hat)%*Cn%*theta.2.Hat
# Estimates of the regression parameter
b1.hat.basis<-numerator/denominator
# Estimates of the empirical variance for the beta estimates
theta.1.Hat<-Vn-Rn%*theta.2.Hat*as.vector(b1.hat.basis)
RSS.Y<-
  t(Y-B2%*theta.2.Hat*as.vector(b1.hat.basis)-B1%*theta.1.Hat)%*
  (Y-B2%*theta.2.Hat*as.vector(b1.hat.basis)-B1%*theta.1.Hat)
smooth.mat<-1/nsamp*(1/as.vector(denominator)*Dn%*t(Dn)+
  B1%*Lambda.1%*(t(B1)))
sigma.error.est<-as.vector(RSS.Y)/(nsamp-2*sum(diag(smooth.mat))+
  sum(diag(crossprod(smooth.mat,smooth.mat))))
RSS.Z<-t(Z-B2%*theta.2.Hat)%*(Z-B2%*theta.2.Hat)
smooth.delta2<-1/nsamp*B2%*Lambda.2%*t(B2)
sigma.u.est<-as.vector(RSS.Z)/(nsamp-2*sum(diag(smooth.delta2))+
  sum(diag(smooth.delta2%*t(smooth.delta2))))
Gn<-Dn/(as.vector(denominator))
Fn<-2*B2%*Lambda.2%*Cn%*theta.2.Hat
An<-(1/nsamp)*t(B2%*theta.2.Hat*as.vector(b1.hat.basis)+
  B1%*theta.1.Hat)%*(B2-B1%*Rn)
Hn<-t(An%*Lambda.2%*t(B2)/as.vector(denominator))-
  as.vector(An%*theta.2.Hat)*Fn/(as.vector(denominator))^2
sigma.beta.est<-1/(nsamp^2)*(sigma.error.est*t(Gn)%*Gn+
  sigma.u.est*t(Hn)%*Hn)
#Codes for the simulated standard error
nboot<-100
sim.b1.hat<-NULL
for (i in 1:nboot)
{
  sim.sigma.Y<-rnorm(nsamp,mean=0,sd=sqrt(sigma.error.est))
  sim.sigma.Delta<-rnorm(nsamp,mean=0,sd=sqrt(sigma.u.est))
  sim.numerator<-An%*theta.2.Hat+
  1/nsamp*(An%*Lambda.2%*t(B2)%*sim.sigma.Delta+
  t(Dn)%*sim.sigma.Y)
  sim.denominator<-t(theta.2.Hat)%*Cn%*theta.2.Hat+
  1/nsamp*t(Fn)%*sim.sigma.Delta)
  sim.new.b1.hat<-sim.numerator/sim.denominator
  sim.b1.hat<-rbind(sim.b1.hat, sim.new.b1.hat)
}
#Estimated regression coefficient
b1.hat<-b1.hat.basis
b1.hat
#Estimation of standard error
se.b1.hat<-sqrt(as.vector(sigma.beta.est))
se.b1.hat
#Estimation of simulated standard error
sim.se.b1.hat<-sqrt(apply(sim.b1.hat,2,var))
sim.se.b1.hat

```

**Table 1**

*Simulation results with varying number of knots for covariate model ( $q_2$ ) for our proposed method. In each case, the number of knots for the residual model ( $q_1$ ) were fixed at 125. Reported numbers are averaged over 1000 simulations. Data were simulated with sample size 500, regression coefficient 2, measurement error variance 0.25 and varying range parameters for spatial correlations.*

| Range*<br>( $\tau_{G_1}$ )                                                                     | Number of knots for covariate model |       |       |
|------------------------------------------------------------------------------------------------|-------------------------------------|-------|-------|
|                                                                                                | 130                                 | 140   | 170   |
| Estimated coefficient                                                                          |                                     |       |       |
| 0.1                                                                                            | 2.016                               | 2.013 | 2.007 |
| 0.3                                                                                            | 2.019                               | 2.016 | 2.010 |
| 0.5                                                                                            | 2.025                               | 2.023 | 2.018 |
| Empirical standard error                                                                       |                                     |       |       |
| 0.1                                                                                            | 0.060                               | 0.061 | 0.068 |
| 0.3                                                                                            | 0.058                               | 0.059 | 0.066 |
| 0.5                                                                                            | 0.052                               | 0.053 | 0.060 |
| Average of estimated standard errors                                                           |                                     |       |       |
| 0.1                                                                                            | 0.048                               | 0.048 | 0.049 |
| 0.3                                                                                            | 0.047                               | 0.047 | 0.047 |
| 0.5                                                                                            | 0.045                               | 0.045 | 0.046 |
| Average of simulated standard errors                                                           |                                     |       |       |
| 0.1                                                                                            | 0.048                               | 0.048 | 0.049 |
| 0.3                                                                                            | 0.047                               | 0.047 | 0.047 |
| 0.5                                                                                            | 0.045                               | 0.045 | 0.046 |
| $\tau_{G_1}$ : values of the range parameter following exponential correlation in $G_1(s_i)$ . |                                     |       |       |
